# Supplementary material for: Common and Specific Functional Activity Features in Schizophrenia, Major Depressive Disorder, and Bipolar Disorder
Source: PubMed Central journal article supplement (PMC6389674; doi:10.3389/fpsyt.2019.00052), 2019-02-19
Supplement: Table_1.pdf [file Table_1.pdf]

**Supplementary Table 1.** The common and specific changes in SZ, MDD and BD.

|                  | <b>Region(AAL)</b>              | <b>Disorders</b> | <b>Size</b> | <b>Coordinate</b> | <b>Peak intensity</b> |
|------------------|---------------------------------|------------------|-------------|-------------------|-----------------------|
| Common changes   | Frontal_Mid_L<br>(-30, 57, 12)  | SZ               | 32          | (-24, 45, 24)     | -4.7361               |
|                  |                                 | MDD              | 15          | (-30, 60, 18)     | -4.0800               |
|                  |                                 | BD               | 58          | (-33, 54, 9)      | -4.8019               |
|                  | Cingulum_Mid_L/R<br>(0, 12, 42) | SZ               | 286         | (0, 57, -6)       | -5.3572               |
|                  |                                 | MDD              | 20          | (0, 21, 45)       | -3.8620               |
|                  |                                 | BD               | 87          | (3, 18, 42)       | -4.8780               |
|                  | Frontal_Sup_R<br>(24, 6, 60)    | SZ               | 47          | (24, 12, 63)      | -5.6098               |
|                  |                                 | MDD              | 41          | (24, 9, 63)       | -4.5162               |
|                  |                                 | BD               | 13          | (24, 12, 66)      | -3.9896               |
| Specific changes | Temporal_Mid_L                  | SZ               | 13          | (-60, -30, 0)     | 3.9076                |
|                  | Caudate_R                       | SZ               | 45          | (15, 0, 18)       | 5.3861                |
|                  | Thalamus_L/R                    | SZ               | 48          | (-6, -15, 12)     | 4.4814                |
|                  | Frontal_Inf_Tri_L               | SZ               | 27          | (-42, 33, 12)     | -4.0564               |
|                  | Caudate_L                       | SZ               | 26          | (-15, -6, 21)     | 4.2429                |
|                  | Frontal_Sup_Medial_L            | SZ               | 15          | (-3, 57, 18)      | -4.6343               |
|                  | Frontal_Mid_L                   | SZ               | 12          | (-24, 48, 24)     | -4.3571               |
|                  | Frontal_Inf_Tri_R               | SZ               | 21          | (54, 18, 23)      | -4.3991               |
|                  | Frontal_Mid_L                   | SZ               | 12          | (-45, 21, 39)     | -3.7807               |
|                  | Frontal_Mid_L                   | SZ               | 45          | (-24, 12, 51)     | -4.6374               |
|                  | Cerebellum Anterior Lobe        | MDD              | 28          | (-21, -42, -39)   | 3.9188                |
|                  | Temporal_Inf_R                  | MDD              | 33          | (48, -18, -30)    | 3.8744                |
|                  | Precentral_L                    | MDD              | 12          | (-51, 9, 12)      | -3.9262               |
|                  | SupraMarginal_L                 | MDD              | 18          | (-63, -33, 36)    | -3.5863               |
|                  | Frontal_Mid_Orb_R               | BD               | 31          | (30, 42, -15)     | -3.9361               |
|                  | Frontal_Mid_Orb_L               | BD               | 41          | (-33, 42, -9)     | -4.2824               |
|                  | Occipital_Inf_R                 | BD               | 40          | (30, -90, -3)     | 3.7883                |
|                  | Frontal_Mid_Orb_R               | BD               | 24          | (30, 57, -9)      | -4.1352               |
|                  | Lingual_R                       | BD               | 18          | (15, -69, -3)     | 4.0456                |
|                  | Putamen_L                       | BD               | 14          | (-27, -15, -3)    | 3.6223                |

|                   |    |    |                |         |
|-------------------|----|----|----------------|---------|
| Occipital_Mid_L   | BD | 73 | (-27, -78, 6)  | 4.9027  |
| Frontal_Sup_L     | BD | 13 | (-12, 72, 9)   | -3.7135 |
| Cingulum_Post_L/R | BD | 87 | (3, -45, 30)   | -4.8780 |
| Frontal_Mid_R     | BD | 59 | (42, 36, 30)   | -4.7228 |
| Frontal_Mid_L     | BD | 17 | (-36, 33, 39)  | -3.9802 |
| Precentral_L      | BD | 28 | (-30, -18, 57) | 4.6312  |

Abbreviations : AAL, automated anatomical labeling; SZ, schizophrenia; MDD, major depressive disorder; BD, bipolar disorder.
